# Supplementary material for: Boundary sequences flanking the mouse tyrosinase locus ensure faithful pattern of gene expression
Source: PubMed Central journal article supplement (PMC7511308; doi:10.1038/s41598-020-72543-0), 2020-09-23
Supplement: 41598_2020_72543_MOESM1_ESM.pdf [file 41598_2020_72543_MOESM1_ESM.pdf]

## **Boundary sequences flanking the mouse tyrosinase locus ensure faithful pattern of gene expression**

Davide Seruggia<sup>1,2</sup>, Almudena Fernández<sup>1</sup>, Marta Cantero<sup>1</sup>, Ana Fernández-Miñán<sup>3</sup>, José Luis Gomez-Skarmeta<sup>3</sup>, Pawel Pelczar<sup>4</sup> and Lluís Montoliu<sup>1,\*</sup>

<sup>1</sup>Department of Molecular and Cellular Biology, National Centre for Biotechnology (CNB-CSIC) Madrid, Spain and CIBERER-ISCIII, Madrid, Spain

<sup>2</sup> Current address: Division of Hematology/Oncology, Boston Children's Hospital, Harvard Medical School, Boston, MA, USA

<sup>3</sup>Centro Andaluz de Biología del Desarrollo (CABD), CSIC-Universidad Pablo de Olavide-Junta de Andalucía, Seville, Spain;

<sup>4</sup>Center for Transgenic Models, University of Basel, Basel, Switzerland

\* Address for correspondence:

Lluís Montoliu

Centro Nacional de Biotecnología (CNB-CSIC)

Campus de Cantoblanco

Darwin 3

28049 Madrid, Spain

Tel +34 915854844

Fax. +34 915854506

Email: [montoliu@cnb.csic.es](mailto:montoliu@cnb.csic.es)

### **SUPPLEMENTARY TABLES AND FIGURES**

**SUPPLEMENTARY TABLE 1: Oligonucleotide sequences**

| <b>Primers used for 3C</b>                  |                     |
|---------------------------------------------|---------------------|
| <b>Anchor on <i>Tyr</i> promoter</b>        |                     |
| AGGGGTTGCTGGAAAAGAAG                        | Tyr_promoter        |
| TTTTCTTGACTTTGTGTCCCTATG                    | Tyr1                |
| TCTTAATGTTGGAAAGTGCAAAGT                    | Tyr2                |
| TCACAACACTGTCATACCATCTG                     | Tyr3                |
| TTGGACCTGTGCTGTGACTAA                       | Tyr5                |
| AAGGACGGAGTGGAGGTTG                         | Tyr6                |
| GGCAGGATGGGACTGAAGTA                        | Tyr11               |
| ATTTGTCTGGGGGCTCATAAC                       | Tyr12               |
| CACACAACACTATCACTACTATCACCAC                | Tyr13               |
| TGTTGAATCCCACCTTTACTCC                      | Tyr14               |
| CCATGCCCTGCTAAATGTGTA                       | Tyr15               |
| CCCAGACCCTTCCAAGTCAGTAT                     | Tyr16               |
| TGGAAAATGAGACACAACGAAG                      | Tyr17               |
| <b>Anchor on <i>Tyr</i> 5'</b>              |                     |
| CACACAACACTATCACTACTATCACCAC                | Tyr_5'              |
| TCACAACACTGTCATACCATCTG                     | Tyr3                |
| AAAGACACCATCCCTCCAAC                        | Tyr7                |
| TTCTCTTTTCTTTTCGCACCA                       | Tyr8                |
| AGGGGTTGCTGGAAAAGAAG                        | Tyr9                |
| CCCAGACCCTTCCAAGTCAGTAT                     | Tyr16               |
| TACAGCAACACATTAGAACCAGA                     | Tyr17               |
| <b>Anchor on CNS-2</b>                      |                     |
| CCCAGACCCTTCCAAGTCAGTAT                     | Tyr_CNS2            |
| TCTCAAATCCCTCCTATCCAA                       | Tyr4                |
| TTGGACCTGTGCTGTGACTAA                       | Tyr5                |
| AAGGACGGAGTGGAGGTTG                         | Tyr6                |
| AGGCTGAGAGTATTTGATGTAAGAA                   | Tyr10               |
| CACACAACACTATCACTACTATCACCAC                | Tyr13               |
| TACAGCAACACATTAGAACCAGA                     | Tyr17               |
| <b><i>Ercc3</i> locus</b>                   |                     |
| GTCTGTCTTTGTTGCTGAAGTATG                    | XBP1                |
| AAGTCCAGTGTGCTGAGGTATT                      | XBP2                |
| <b>Primers used for cloning EBA vectors</b> |                     |
| CAGCTCGAGACAGAAATGGCCCCACCTAT               | XhoI_tyr3'F (2.5kb) |

|                                          |                     |
|------------------------------------------|---------------------|
| CAGCTCGAGTGCATTTGAACTTGACCTACTGA         | XhoI_tyr3'R (2.5kb) |
| CAGCTGCAGACAGAAATGGCCCCACCTAT            | PstI_tyr3'F (2.5kb) |
| CAGCTGCAGTGCATTTGAACTTGACCTACTGA         | PstI_tyr3'R (2.5kb) |
| CAGCTGCAGCCAGGTGAGGGGTGTGTTTA            | XhoI_tyr3'F (241bp) |
| CAGCTGCAGGAAGTGTTTATTGACAATGTG           | XhoI_tyr3'R (241bp) |
| CAGCTCGAGCCAGGTGAGGGGTGTGTTTA            | PstI_tyr3'F (241bp) |
| CAGCTCGAGGAAGTGTTTATTGACAATGTG           | PstI_tyr3'R (241bp) |
| TGTCTTCAGACACTCGAGAATAGAGCGCCAGATCTTGTTA | 3'CTCFmutF          |
| TAACAAGATCTGGCGCTCTATTCTCGAGTGTCTGAAGACA | 3'CTCFmutR          |
| <b>primers for cloning of sgRNAs</b>     |                     |
| ACACCAGCTCAGTAGAGTACTAGGTG               | Tyr3'3gRNAFw        |
| AAAACACCTAGTACTCTACTGAGCTG               | Tyr3'3gRNARv        |
| ACACCACAAACGCTAATTGGTAAAAG               | Tyr3'5gRNAFw        |
| AAAACTTTTACCAATTAGCGTTTGTG               | Tyr3'5gRNARv        |
| <b>Primers for mouse genotyping</b>      |                     |
| CAACCAGGCTTTCATCAGAAT                    | Tyr5_delF           |
| TTTTCTCTGTATCATGATTGCCTA                 | Tyr5_delR           |
| TCTGTGCATGGTATACAACAGGG                  | Tyr3_delF           |
| GTGCATTAAAGGAAGCCCAATGA                  | Tyr3_delR           |



## Supplemental Figure 2

**a**

chr7-94,656,561-94,656,970 (mm9); **Sox10**, **Mitf**

ATAACAGGAAAATAAACAGCCACATTCCTGCCTTTGTAGAAGTTCACAATCTGAATAGGAATATAAAAAGGTGATGGTGTGGCAATTCAGGACTCTTTATTGGGTACA

TATTGTTAATAATATTGTGGTTTGCCAGGACCCAGCAGGAAGCAGCTGACACACTCAAGCTGGTTCTTTGAACAGAGTTT**AAGAAAGAAGCTATTT**ACAATGTTGGGG

GTGGAATTTA**AGAAGAAAGGACAGTGG**AATAAGAAAAGGATACTCAGAACAACCTGCT**GGAACACAGACATCACTG**TCTTGACAA**AGTCAGCTGGC**AGGAACCTATGACCT  
|-----| B box |-----| A box  
|-----| USF-1 motif

TGGAGAAGGATATAAGCAACTTTCCTGTTATGTGGCAAAGAGGAAGTTGCAGACCTTTGACTTCACTCTCCTTCTGCCTCTAA

**b**

| TF          | TRANSFAC   |                                                 | UNIPROBE     |            |                      |
|-------------|------------|-------------------------------------------------|--------------|------------|----------------------|
|             | KO mouse   | pigmentation                                    | TF           | KO mouse   | pigmentation         |
| Ets         | yes        | normal                                          | Lmx1b        | yes        | normal               |
| Cdx2        | lethal     | n.a.                                            | Sry          | yes        | normal               |
| Runx2       | yes        | normal                                          | Pou4f3       | yes        | normal               |
| Sry         | yes        | normal                                          | <b>Lmx1a</b> | <b>yes</b> | <b>white spotted</b> |
| Nfatc2      | yes        | normal                                          | Arid1a       | yes        | normal               |
| Nr5a2       | lethal     | n.a.                                            | Sox7         | lethal     | n.a.                 |
| Myb         | yes        | normal                                          | Sox12        | yes        | normal               |
| Ttf1        | n.a.       | n.a.                                            |              |            |                      |
| Bptf        | lethal     | n.a.                                            |              |            |                      |
| <b>Lef1</b> | <b>yes</b> | <b>aberrant melanocytes<br/>with no melanin</b> |              |            |                      |

# Supplemental Figure 3

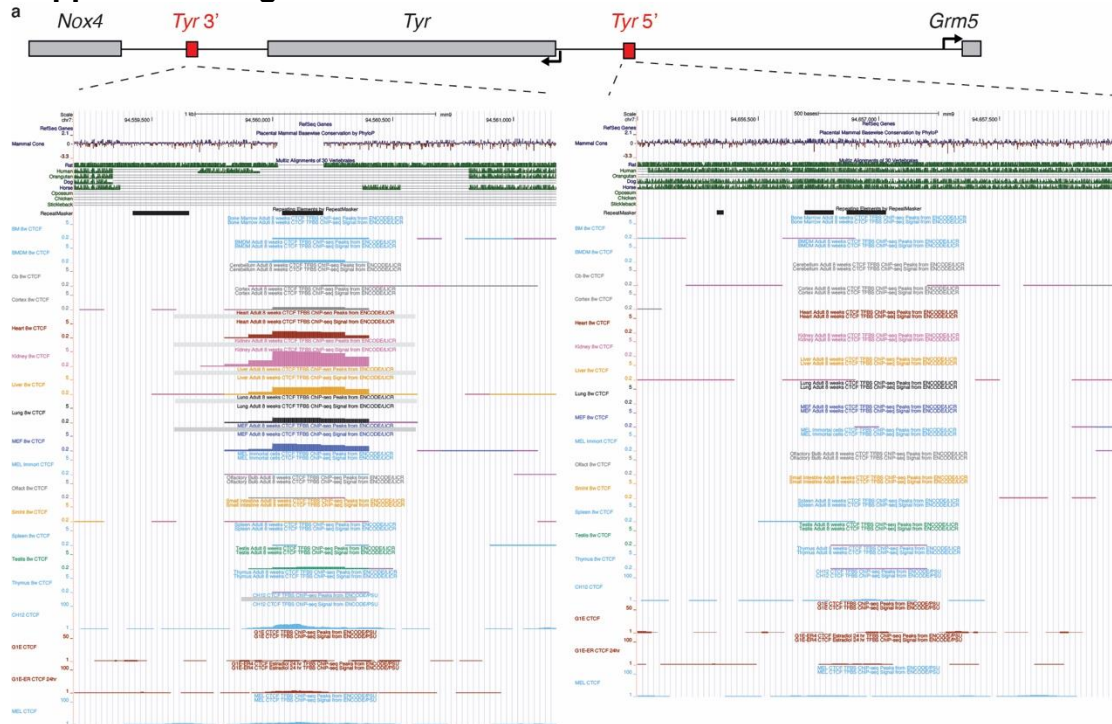

**b**

GAAGTGTATTGACAATGTGACATTTGTTTGGTTTGGTTTTTAAAGATTTATTTATTTATATGTAAGTTC  
**ACTGTAGCTGCTTCAGACACTCCAGAAGAGGGGCCAGATCTTGTACGGATGGTTGTGAGCCCCATGTGGTTG**  
**ACCTTCGGAAGAGCAGTCAGTGTCTTAGCTGCTGAGCCATCTCCAGCCCTGACATTTGTGATATTTTTAAACAC**  
 ACCCTCACCTGG

chr7:94560004-94560244 (minus strand)

**c**

GAAGTGTATTGACAATGTGACATTTGTTTGGTTTGGTTTTTAAAGATTTATTTATTTATATGTAAGTTC  
 ACTGTAGCTGCTTCAGAC**ACTCCAGAAGAGGGGCCAG**ATCTTGTACGGATGGTTGTGAGCCCCATGTGGTTG  
 ACCTTCGGAAGAGCAGTCAGTGTCTTAGCTGCTGAGCCATCTCCAGCCCTGACATTTGTGATATTTTTAAACAC  
 ACCCTCACCTGG

**d**

5' -ACTCCAGAAGAGGGGCCAG-3' wt

5' -ACTCGA**GAATAG**AGGCCAG-3' mutated

### Supplemental Figure 4

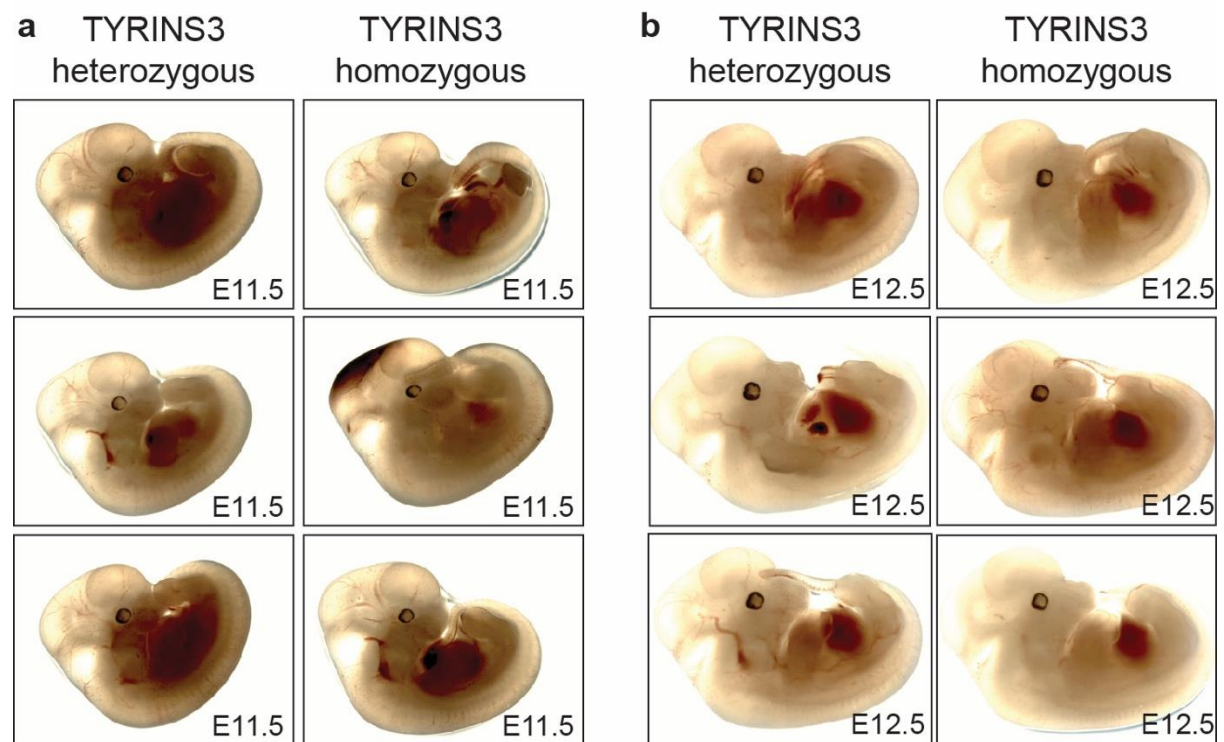

## SUPPLEMENTARY FIGURE LEGENDS

### **Supplemental Figure S1: Chromosome conformation of the mouse *Tyr* locus.**

(a) Diagram of the DpnII restriction sites at the *Tyr* promoter and *Tyr* 5' element. MITF binding sites at the *Tyr* promoter are indicated as yellow circles. A, B and G boxes are highlighted in black. 3C primers are depicted as black arrows (b) Sanger sequencing of chimeric ligation products resulting by proximity ligation of DpnII fragments at the *Tyr* promoter and *Tyr* 5' element. (c) Diagram of the DpnII restriction sites at the *Tyr* promoter and *Tyr* 3' element. (d) Sanger sequencing of chimeric ligation products resulting by proximity ligation of DpnII fragments at the *Tyr* 3' element and *Tyr* promoter. Genomic coordinates are indicated (mm9). Figure prepared with Adobe Illustrator.

### **Supplemental Figure S2: The *Tyr* 5' element contains a melanocyte-specific *Tyr* enhancer**

(a) Sequence of the *Tyr* 5' core enhancer. Sox10 binding motifs are highlighted in red; Mitf motif is highlighted in green. A and B box sequences are boxed; the Usf-1 motif, carrying insulator activity, is indicated (b) Additional transcription factor binding motif predictions using TRANSFAC and UNIPROBE. Figure prepared with Adobe Illustrator.

### **Supplemental Figure S3: The *Tyr* locus is flanked by chromatin boundaries**

(a) Genomic view of the *Tyr* 3' and *Tyr* 5' elements. Mammalian sequence conservation and repeat DNA tracks from USCS Genome Browser. CTCF occupancy in mouse cell lines and tissues from ENCODE. (c) Sequence of the *Tyr* 3' core element; the SINEB2 sequence is highlighted in red. The CTCF binding motif is highlighted in red. (d) CTCF binding motif compared with its mutagenized version used in zebrafish. Figure prepared with the help of Adobe Illustrator program.



**Supplemental Figure S4: Deleting the *Tyr* 3' element in mice does not alter the pattern *Tyr* gene expression.** (a) Heterozygous and homozygous TYRINS3 E11.5 embryos (b) Heterozygous and homozygous TYRINS3 E12.5 embryos. Figure prepared with Adobe Illustrator. The images included in this figure have been obtained by Davide Seruggia at the CNB-CSIC in Madrid under the supervision of Lluís Montoliu.
